# Supplementary material for: Structure and Formation Mechanisms in Tantalum and Niobium Oxides in Superconducting Quantum Circuits
Source: PubMed Central journal article supplement — ACS Nano. 2024 Jul 22;18(30):19732–41. doi: 10.1021/acsnano.4c05251 (PMC11295204; doi:10.1021/acsnano.4c05251), 2024-07-22
Supplement: nn4c05251_si_001.pdf [file nn4c05251_si_001.pdf]

## Supporting Information

### Structure and Formation Mechanisms in Tantalum and Niobium Oxides in Superconducting Quantum Circuits

Jin-Su Oh,<sup>1</sup> Rahim Zaman,<sup>2</sup> Akshay A. Murthy,<sup>3</sup> Mustafa Bal,<sup>3</sup> Francesco Crisa,<sup>3</sup> Shaojiang Zhu,<sup>3</sup> Carlos G. Torres-Castendo,<sup>4</sup> Cameron J. Kopas,<sup>5</sup> Joshua Y. Mutus,<sup>5</sup> Dapeng Jing,<sup>6</sup> John Zasadzinski,<sup>7</sup> Anna Grassellino,<sup>3</sup> Alex Romanenko,<sup>3</sup> Mark C. Hersam,<sup>4</sup> Michael J. Bedzyk,<sup>4</sup> Matt Kramer,<sup>1</sup> Bi-Cheng Zhou,<sup>2</sup> and Lin Zhou<sup>1,8\*</sup>

<sup>1</sup> Ames National Laboratory, Ames, Iowa 50011, United States

<sup>2</sup> Department of Materials Science and Engineering, University of Virginia, Charlottesville, Virginia, 22904, United States

<sup>3</sup> Superconducting Quantum Materials and Systems Division, Fermi National Accelerator Laboratory, Batavia, Illinois 60510, United States

<sup>4</sup> Department of Materials Science and Engineering, Northwestern University, Evanston, Illinois 60208, United States

<sup>5</sup> Rigetti Computing, Berkeley, California 94710, United States

<sup>6</sup> The Materials Analysis Research Laboratory, Iowa State University, Ames Iowa 50011, United States

<sup>7</sup> Department of Physics, Illinois Institute of Technology, Chicago, Illinois 60616, United States

<sup>8</sup> Department of Materials Science and Engineering, Iowa State University, Ames, Iowa 50011, United States

\*Corresponding author: [linzhou@ameslab.gov](mailto:linzhou@ameslab.gov)

### Keywords

Superconducting qubits, Surface encapsulation, Tantalum oxides, Niobium oxides, STEM-EELS, CALPHAD, Crystal-field splitting

**Table of contents:**

**S1: Principal component analysis of O K edge EELS spectra across the TaO<sub>x</sub>-Ta interface.**

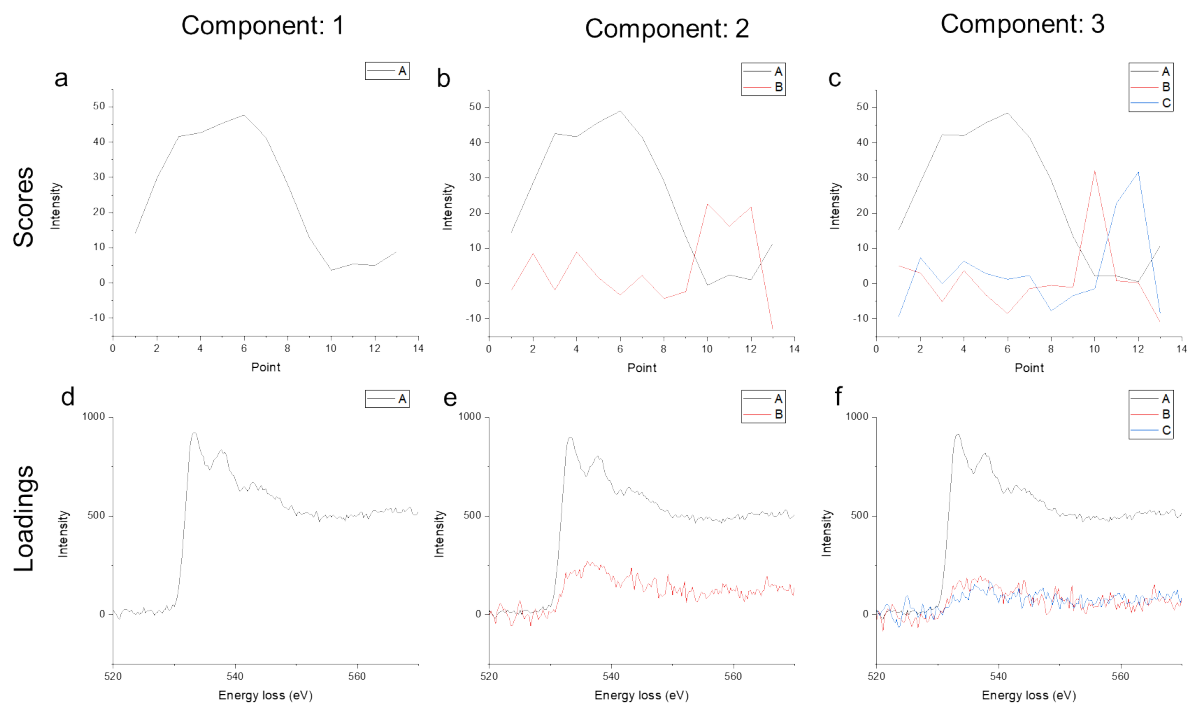

**Fig. S1. Principal component analysis of O K edge EELS spectra across the TaO<sub>x</sub>-Ta interface. a-c,** Scores as a function of points from the outermost point of TaO<sub>x</sub> layer to Ta metal when component number are 1-3, respectively. **d-f,** Loadings showing each O K edge in respect to the component number 1-3. **f** Note that the O K edge spectra of B and C in component number 3 barely differ, indicating that two components are sufficient to comprise the TaO<sub>x</sub>-Ta interface.
